# Supplementary material for: Peer Victimization, Internalizing Problems, and the Buffering Role of Friendship Quality: Disaggregating Between- and Within-Person Associations
Source: Springer Nature journal article supplement (doi:10.1007/s10964-022-01619-z), 2022-04-28

## Online Supplementary Materials

|             |                                                                                                                                                  |
|-------------|--------------------------------------------------------------------------------------------------------------------------------------------------|
| Paper title | Peer Victimization, Internalizing Problems, and the Buffering Role of Friendship Quality: Disaggregating Between- and Within-Person Associations |
| Journal     | Journal of Youth and Adolescence                                                                                                                 |
| Authors     | Esther L. Bernasco (corresponding author)<br>Jolien van der Graaff<br>Wim H. J. Meeus<br>Susan Branje                                            |

### S1. Sensitivity Analysis: Separating Relational and Physical Victimization

**Table S1**

*Descriptive Statistics for Physical and Relational Victimization Collapsed Across all 6 Waves*

| Variable  | <i>M</i> | <i>SD</i> | ICC  | Bivariate correlations |         |          |          |         |
|-----------|----------|-----------|------|------------------------|---------|----------|----------|---------|
|           |          |           |      | Depression             | Anxiety | Support  | Conflict | RelVic  |
| 3. RelVic | 1.95     | 1.07      | 0.51 | .49 ***                | .45 *** | -.05 *   | .22 ***  |         |
| 4. PhyVic | 1.45     | 0.81      | 0.40 | .29 ***                | .25 *** | -.10 *** | .23 ***  | .58 *** |

*Note.* ICC = intraclass correlation, RelVic = relational victimization, PhyVic = physical victimization.

\*  $p < .05$ . \*\*\*  $p < .001$ .

**Table S2***Model Results for Relational Victimization*

| Variable                   | Between-person associations |      |                | Within-person associations |      |                |
|----------------------------|-----------------------------|------|----------------|----------------------------|------|----------------|
|                            | Est                         | SE   | 95% CI         | Est                        | SE   | 95% CI         |
| <b>Depressive symptoms</b> |                             |      |                |                            |      |                |
| Gender                     | 0.31 ***                    | 0.03 | [ 0.37, 0.25]  |                            |      |                |
| RelVic                     | 0.21 ***                    | 0.03 | [ 0.26, 0.16]  | 0.12 ***                   | 0.01 | [ 0.14, 0.09]  |
| Support                    | -0.09 **                    | 0.04 | [-0.02, -0.16] | -0.04 ***                  | 0.01 | [-0.02, -0.07] |
| Conflict                   | 0.08                        | 0.06 | [ 0.19, -0.03] | 0.05                       | 0.03 | [ 0.11, 0.00]  |
| RelVic*Support             | -0.11 ***                   | 0.03 | [-0.05, -0.17] | -0.02                      | 0.02 | [ 0.02, -0.06] |
| RelVic*Conflict            | -0.08                       | 0.05 | [ 0.02, -0.19] | 0.05                       | 0.03 | [ 0.11, -0.01] |
| RelVic*Gender              | 0.12 ***                    | 0.04 | [ 0.19, 0.05]  | 0.00                       | 0.02 | [ 0.05, -0.04] |
| Support*Gender             | -0.09                       | 0.06 | [ 0.02, -0.20] |                            |      |                |
| Conflict*Gender            | 0.07                        | 0.09 | [ 0.25, -0.11] | 0.03                       | 0.05 | [ 0.12, -0.06] |
| <b>Anxiety</b>             |                             |      |                |                            |      |                |
| Gender                     | 0.18 ***                    | 0.02 | [ 0.21, 0.15]  |                            |      |                |
| RelVic                     | 0.09 ***                    | 0.01 | [ 0.12, 0.06]  | 0.06 ***                   | 0.01 | [ 0.08, 0.04]  |
| Support                    | -0.02                       | 0.02 | [ 0.02, -0.06] | 0.01                       | 0.01 | [ 0.03, 0.00]  |
| Conflict                   | 0.05                        | 0.03 | [ 0.11, -0.01] | 0.05 ***                   | 0.02 | [ 0.08, 0.02]  |
| RelVic*Support             | -0.05 ***                   | 0.02 | [-0.02, -0.09] | 0.00                       | 0.01 | [ 0.02, -0.02] |
| RelVic*Conflict            | 0.01                        | 0.03 | [ 0.07, -0.04] | 0.01                       | 0.02 | [ 0.04, -0.02] |
| RelVic*Gender              | 0.07 ***                    | 0.02 | [ 0.11, 0.03]  | 0.02                       | 0.01 | [ 0.05, 0.00]  |
| Support*Gender             | -0.07 **                    | 0.03 | [-0.01, -0.13] | -0.03 **                   | 0.01 | [ 0.00, -0.06] |
| Conflict*Gender            | 0.02                        | 0.05 | [ 0.12, -0.08] | -0.02                      | 0.02 | [ 0.03, -0.07] |

*Note.* RelVic = relational victimization. Boys = 0, girls = 1. Interactions with gender under “within-person associations” are cross-level interactions. When there was no variation in within-person slopes, these interactions were not included.

\*\*  $p < .01$ , \*\*\*  $p < .001$ .

**Table S3***Model Results for Physical Victimization*

| Variable            | Between-person associations |      |                | Within-person associations |      |                |
|---------------------|-----------------------------|------|----------------|----------------------------|------|----------------|
|                     | Est                         | SE   | 95% CI         | Est                        | SE   | 95% CI         |
| Depressive symptoms |                             |      |                |                            |      |                |
| Gender              | 0.49 ***                    | 0.04 | [ 0.56, 0.43]  |                            |      |                |
| PhyVic              | 0.22 ***                    | 0.04 | [ 0.29, 0.15]  | 0.10 ***                   | 0.02 | [ 0.14, 0.07]  |
| Support             | -0.08 **                    | 0.04 | [ 0.00, -0.16] | -0.04 ***                  | 0.01 | [-0.01, -0.06] |
| Conflict            | 0.11                        | 0.06 | [ 0.23, -0.02] | 0.05                       | 0.03 | [ 0.11, 0.00]  |
| PhyVic*Support      | -0.16 **                    | 0.06 | [-0.05, -0.28] | -0.02                      | 0.03 | [ 0.03, -0.07] |
| PhyVic*Conflict     | -0.15                       | 0.08 | [ 0.01, -0.31] | 0.06                       | 0.04 | [ 0.13, -0.01] |
| PhyVic*Gender       | 0.33 ***                    | 0.07 | [ 0.46, 0.21]  | 0.02                       | 0.03 | [ 0.08, -0.04] |
| Support*Gender      | -0.18 ***                   | 0.06 | [-0.06, -0.31] |                            |      |                |
| Conflict*Gender     | 0.07                        | 0.11 | [ 0.27, -0.14] | 0.06                       | 0.05 | [ 0.16, -0.03] |
| Anxiety             |                             |      |                |                            |      |                |
| Gender              | 0.26 ***                    | 0.02 | [ 0.30, 0.23]  |                            |      |                |
| PhyVic              | 0.09 ***                    | 0.02 | [ 0.13, 0.06]  | 0.06 ***                   | 0.01 | [ 0.07, 0.04]  |
| Support             | -0.01                       | 0.02 | [ 0.03, -0.06] | 0.01                       | 0.01 | [ 0.03, -0.01] |
| Conflict            | 0.04                        | 0.04 | [ 0.11, -0.03] | 0.04 **                    | 0.02 | [ 0.08, 0.01]  |
| PhyVic*Support      | -0.09 **                    | 0.03 | [-0.03, -0.15] | 0.00                       | 0.01 | [ 0.03, -0.03] |
| PhyVic*Conflict     | 0.00                        | 0.04 | [ 0.09, -0.09] | 0.02                       | 0.02 | [ 0.06, -0.02] |
| PhyVic*Gender       | 0.15 ***                    | 0.04 | [ 0.22, 0.08]  | 0.02                       | 0.02 | [ 0.05, -0.01] |
| Support*Gender      | -0.11 ***                   | 0.04 | [-0.04, -0.18] | -0.02                      | 0.01 | [ 0.01, -0.05] |
| Conflict*Gender     | 0.10                        | 0.06 | [ 0.21, -0.02] | 0.01                       | 0.03 | [ 0.06, -0.04] |

*Note.* PhyVic = physical victimization. Boys = 0, girls = 1. Interactions with gender under “within-person associations” are cross-level interactions. When there was no variation in within-person slopes, these interactions were not included.

\*\*  $p < .01$ , \*\*\*  $p < .001$ .

## S2. Sensitivity Analysis: Controlled for Time

**Table S4**

*Model Results Controlled for Age*

| Variable            | Between-person associations |      |                | Within-person associations |      |                |
|---------------------|-----------------------------|------|----------------|----------------------------|------|----------------|
|                     | Est                         | SE   | 95% CI         | Est                        | SE   | 95% CI         |
| Depressive symptoms |                             |      |                |                            |      |                |
| Time                | 0.01 **                     | 0.00 | [ 0.01, 0.00]  |                            |      |                |
| Gender              | 0.38 ***                    | 0.03 | [ 0.43, 0.32]  |                            |      |                |
| Victimization       | 0.24 ***                    | 0.03 | [ 0.30, 0.18]  | 0.14 ***                   | 0.02 | [ 0.18, 0.11]  |
| Support             | -0.09 **                    | 0.04 | [-0.02, -0.16] | -0.04 ***                  | 0.01 | [-0.01, -0.06] |
| Conflict            | 0.08                        | 0.06 | [ 0.18, -0.03] | 0.05                       | 0.03 | [ 0.10, -0.01] |
| Vict*Support        | -0.16 ***                   | 0.04 | [-0.08, -0.24] | -0.03                      | 0.03 | [ 0.02, -0.08] |
| Vict*Conflict       | -0.14 **                    | 0.06 | [-0.02, -0.26] | 0.07                       | 0.04 | [ 0.14, -0.01] |
| Vict*Gender         | 0.24 ***                    | 0.05 | [ 0.33, 0.15]  | 0.03                       | 0.03 | [ 0.08, -0.03] |
| Support*Gender      | -0.12 **                    | 0.05 | [-0.02, -0.23] |                            |      |                |
| Conflict*Gender     | 0.04                        | 0.09 | [ 0.22, -0.14] | 0.04                       | 0.05 | [ 0.13, -0.05] |
| Anxiety             |                             |      |                |                            |      |                |
| Time                | -0.01 ***                   | 0.00 | [ 0.00, -0.01] |                            |      |                |
| Gender              | 0.21 ***                    | 0.02 | [ 0.25, 0.18]  |                            |      |                |
| Victimization       | 0.10 ***                    | 0.02 | [ 0.13, 0.07]  | 0.07 ***                   | 0.01 | [ 0.09, 0.05]  |
| Support             | -0.02                       | 0.02 | [ 0.02, -0.06] | 0.01                       | 0.01 | [ 0.03, -0.01] |
| Conflict            | 0.04                        | 0.03 | [ 0.10, -0.02] | 0.04 **                    | 0.02 | [ 0.07, 0.01]  |
| Vict*Support        | -0.08 ***                   | 0.02 | [-0.04, -0.12] | 0.00                       | 0.01 | [ 0.03, -0.02] |
| Vict*Conflict       | 0.00                        | 0.03 | [ 0.07, -0.07] | 0.02                       | 0.02 | [ 0.06, -0.02] |
| Vict*Gender         | 0.13 ***                    | 0.03 | [ 0.18, 0.08]  | 0.03 **                    | 0.02 | [ 0.07, 0.00]  |
| Support*Gender      | -0.09 **                    | 0.03 | [-0.03, -0.15] | -0.03 **                   | 0.01 | [ 0.00, -0.06] |
| Conflict*Gender     | 0.03                        | 0.05 | [ 0.13, -0.07] | -0.01                      | 0.02 | [ 0.04, -0.06] |

*Note.* Vict = victimization. Interactions with gender under “within-person associations” are cross-level interactions. When there was no variation in within-person slopes, these interactions were not included.

\*\*  $p < .01$ , \*\*\*  $p < .001$ .

**Table S5***Model Results Controlled for Age Including Interactions*

| Variable            | Between-person |      |                | Within-person |      |                |
|---------------------|----------------|------|----------------|---------------|------|----------------|
|                     | Est            | SE   | 95% CI         | Est           | SE   | 95% CI         |
| Depressive symptoms |                |      |                |               |      |                |
| Gender              | 0.37 ***       | 0.03 | [ 0.43, 0.31]  |               |      |                |
| Vict                | 0.24 ***       | 0.03 | [ 0.30, 0.19]  | 0.27 ***      | 0.03 | [ 0.33, 0.21]  |
| Support             | -0.08 **       | 0.04 | [-0.01, -0.15] | -0.05         | 0.03 | [ 0.01, -0.11] |
| Conflict            | 0.08           | 0.06 | [ 0.19, -0.03] | 0.02          | 0.05 | [ 0.13, -0.08] |
| Vict*Support        | -0.15 ***      | 0.04 | [-0.08, -0.23] | -0.06 **      | 0.03 | [ 0.00, -0.11] |
| Vict*Conflict       | -0.13 **       | 0.06 | [-0.01, -0.26] | 0.05          | 0.04 | [ 0.13, -0.02] |
| Gender*Vict         | 0.24 ***       | 0.05 | [ 0.32, 0.15]  | 0.03          | 0.03 | [ 0.08, -0.02] |
| Gender*Support      | -0.12 **       | 0.05 | [-0.02, -0.23] |               |      |                |
| Gender*Conflict     | 0.04           | 0.09 | [ 0.22, -0.14] | 0.03          | 0.04 | [ 0.12, -0.06] |
| Age                 |                |      |                | 0.01          | 0.00 | [ 0.01, 0.00]  |
| Age*Vict            |                |      |                | -0.04 ***     | 0.01 | [-0.02, -0.06] |
| Age*Support         |                |      |                | 0.00          | 0.01 | [ 0.02, -0.01] |
| Age*Conflict        |                |      |                | 0.01          | 0.01 | [ 0.03, -0.02] |
| Anxiety             |                |      |                |               |      |                |
| Gender              | 0.21 ***       | 0.02 | [ 0.24, 0.17]  |               |      |                |
| Vict                | 0.10 ***       | 0.02 | [ 0.13, 0.07]  | 0.13 ***      | 0.02 | [ 0.17, 0.10]  |
| Support             | -0.02          | 0.02 | [ 0.02, -0.06] | 0.03          | 0.02 | [ 0.06, 0.00]  |
| Conflict            | 0.04           | 0.03 | [ 0.10, -0.02] | 0.03          | 0.03 | [ 0.09, -0.02] |
| Vict*Support        | -0.08 ***      | 0.02 | [-0.03, -0.12] | -0.01         | 0.01 | [ 0.02, -0.04] |
| Vict*Conflict       | 0.00           | 0.03 | [ 0.07, -0.06] | 0.01          | 0.02 | [ 0.05, -0.03] |
| Gender*Vict         | 0.13 ***       | 0.03 | [ 0.18, 0.08]  | 0.03 **       | 0.02 | [ 0.07, 0.00]  |
| Gender*Support      | -0.09 **       | 0.03 | [-0.02, -0.15] | -0.03 **      | 0.01 | [ 0.00, -0.06] |
| Gender*Conflict     | 0.03           | 0.05 | [ 0.13, -0.07] | -0.01         | 0.02 | [ 0.03, -0.06] |
| Age                 |                |      |                | -0.01 ***     | 0.00 | [-0.01, -0.01] |
| Age*Vict            |                |      |                | -0.02 ***     | 0.00 | [-0.01, -0.03] |
| Age*Support         |                |      |                | -0.01         | 0.00 | [ 0.00, -0.01] |
| Age*Conflict        |                |      |                | 0.00          | 0.01 | [ 0.02, -0.01] |

*Note.* Vict = victimization. Interactions with gender under “within-person associations” are cross-level interactions. For support\*gender, this interaction was not included because there was no significant variation in within-person slopes.

\*  $p < .05$ , \*\*  $p < .01$ , \*\*\*  $p < .001$ .

**Figure 1**

*The Moderating Role of Age on the Effect of Victimization on Depressive Symptoms (Left) and Anxiety (Right)*

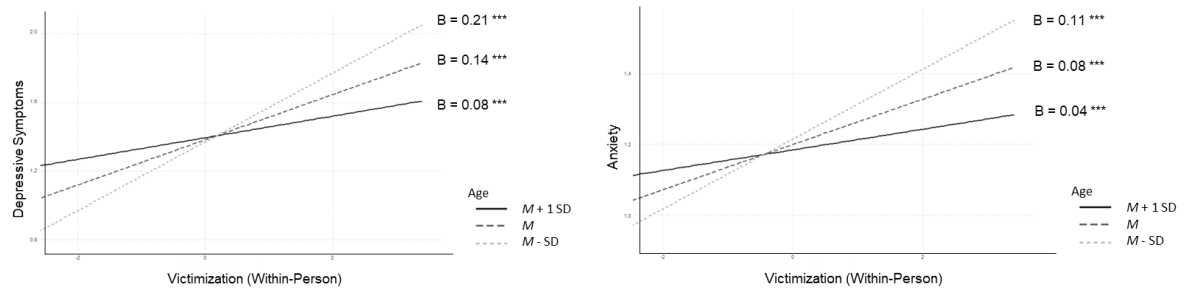

### S3. Sensitivity Analysis: Cross-Level Interactions

**Table S6**

*Model Results with Cross-Level Interactions Between Friendship Quality (Within-Person) and Peer Victimization (Between-Person)*

| Variable            | Between-person associations |      |                | Within-person associations |      |               |
|---------------------|-----------------------------|------|----------------|----------------------------|------|---------------|
|                     | Est                         | SE   | 95% CI         | Est                        | SE   | 95% CI        |
| Depressive symptoms |                             |      |                |                            |      |               |
| Gender              | 0.37 ***                    | 0.03 | [ 0.42, 0.31]  |                            |      |               |
| Victimization       | 0.26 ***                    | 0.03 | [ 0.31, 0.20]  | 0.14 ***                   | 0.02 | [0.18, 0.10]  |
| Support             | -0.08 **                    | 0.04 | [-0.01, -0.15] |                            |      |               |
| Conflict            | 0.07                        | 0.06 | [ 0.18, -0.04] |                            |      |               |
| Vict*Support        | -0.14 ***                   | 0.04 | [-0.06, -0.22] | -0.02                      | 0.03 | [0.03, -0.07] |
| Vict*Conflict       | -0.16 **                    | 0.06 | [-0.04, -0.28] | -0.06                      | 0.04 | [0.02, -0.13] |
| Vict*Gender         | 0.22 ***                    | 0.04 | [ 0.30, 0.13]  | 0.05                       | 0.03 | [0.11, -0.01] |
| Support*Gender      | -0.13 **                    | 0.05 | [-0.02, -0.24] |                            |      |               |
| Conflict*Gender     | 0.02                        | 0.09 | [ 0.20, -0.15] |                            |      |               |
| Anxiety             |                             |      |                |                            |      |               |
| Gender              | 0.21 ***                    | 0.02 | [ 0.24, 0.17]  |                            |      |               |
| Victimization       | 0.12 ***                    | 0.02 | [ 0.15, 0.08]  | 0.08 ***                   | 0.01 | [0.10, 0.06]  |
| Support             | -0.01                       | 0.02 | [ 0.03, -0.05] |                            |      |               |
| Conflict            | 0.03                        | 0.03 | [ 0.09, -0.03] |                            |      |               |
| Vict*Support        | -0.05 **                    | 0.02 | [-0.01, -0.09] | 0.00                       | 0.01 | [0.03, -0.03] |
| Vict*Conflict       | -0.03                       | 0.03 | [ 0.04, -0.10] | -0.01                      | 0.02 | [0.03, -0.06] |
| Vict*Gender         | 0.11 ***                    | 0.03 | [ 0.16, 0.06]  | 0.04 **                    | 0.02 | [0.07, 0.01]  |
| Support*Gender      | -0.10 ***                   | 0.03 | [-0.03, -0.16] |                            |      |               |
| Conflict*Gender     | 0.01                        | 0.05 | [ 0.11, -0.09] |                            |      |               |

*Note.* Vict = victimization. All interactions under “within-person associations” are cross-level interactions.

\*\*  $p < .01$ , \*\*\*  $p < .001$ .



#### S4. Ad-Hoc Analysis: Friend Stability

**Table S7**

*Model results controlling for friend stability*

| Variable            | Between-person |      |                | Within-person |      |               |
|---------------------|----------------|------|----------------|---------------|------|---------------|
|                     | Est            | SE   | 95% CI         | Est           | SE   | 95% CI        |
| Depressive symptoms |                |      |                |               |      |               |
| Stability           | 0.00           | 0.03 | [ 0.06, -0.05] |               |      |               |
| Gender              | 0.37 ***       | 0.03 | [ 0.43, 0.31]  |               |      |               |
| Vict                | 0.18 ***       | 0.04 | [ 0.25, 0.11]  | 0.12 ***      | 0.02 | [0.16, 0.08]  |
| Support             | -0.08          | 0.05 | [ 0.01, -0.17] | -0.03 **      | 0.02 | [0.00, -0.06] |
| Conflict            | 0.07           | 0.07 | [ 0.21, -0.08] | 0.03          | 0.03 | [0.09, -0.04] |
| Vict*Support        | -0.15 ***      | 0.04 | [-0.08, -0.23] | -0.03         | 0.03 | [0.02, -0.08] |
| Vict*Conflict       | -0.10          | 0.06 | [ 0.03, -0.22] | 0.07          | 0.04 | [0.14, 0.00]  |
| Gender*Vict         | 0.24 ***       | 0.05 | [ 0.33, 0.15]  | 0.03          | 0.03 | [0.08, -0.02] |
| Gender*Support      | -0.13 **       | 0.06 | [-0.02, -0.23] |               |      |               |
| Gender*Conflict     | 0.02           | 0.09 | [ 0.20, -0.15] | 0.04          | 0.05 | [0.13, -0.05] |
| Stability*Vict      | 0.14 ***       | 0.04 | [ 0.23, 0.05]  | 0.04          | 0.03 | [0.09, -0.01] |
| Stability*Support   | 0.01           | 0.05 | [ 0.11, -0.09] | -0.03         | 0.03 | [0.02, -0.08] |
| Stability*Conflict  | 0.03           | 0.09 | [ 0.21, -0.14] | 0.04          | 0.05 | [0.13, -0.05] |
| Anxiety             |                |      |                |               |      |               |
| Stability           | -0.02          | 0.02 | [ 0.02, -0.05] |               |      |               |
| Gender              | 0.21 ***       | 0.02 | [ 0.24, 0.17]  |               |      |               |
| Vict                | 0.08 ***       | 0.02 | [ 0.12, 0.04]  | 0.07 ***      | 0.01 | [0.10, 0.05]  |
| Support             | -0.01          | 0.03 | [ 0.04, -0.06] | 0.01          | 0.01 | [0.03, -0.02] |
| Conflict            | 0.05           | 0.04 | [ 0.13, -0.03] | 0.04 **       | 0.02 | [0.08, 0.00]  |
| Vict*Support        | -0.08 ***      | 0.02 | [-0.04, -0.12] | 0.00          | 0.01 | [0.03, -0.02] |
| Vict*Conflict       | 0.01           | 0.04 | [ 0.08, -0.06] | 0.02          | 0.02 | [0.06, -0.02] |
| Gender*Vict         | 0.13 ***       | 0.03 | [ 0.18, 0.08]  | 0.04 **       | 0.02 | [0.07, 0.00]  |
| Gender*Support      | -0.09 **       | 0.03 | [-0.03, -0.15] | -0.03 **      | 0.01 | [0.00, -0.06] |
| Gender*Conflict     | 0.02           | 0.05 | [ 0.12, -0.08] | -0.01         | 0.02 | [0.04, -0.06] |
| Stability*Vict      | 0.05 **        | 0.02 | [ 0.10, 0.00]  | 0.01          | 0.02 | [0.04, -0.03] |
| Stability*Support   | -0.01          | 0.03 | [ 0.05, -0.06] | 0.02          | 0.01 | [0.04, -0.01] |
| Stability*Conflict  | -0.01          | 0.05 | [ 0.08, -0.11] | 0.01          | 0.03 | [0.06, -0.04] |

*Note.* Vict = victimization. Interactions with gender under “within-person associations” are cross-level interactions. For support\*gender, this interaction was not included because there was no significant variation in within-person slopes.

\*  $p < .05$ , \*\*  $p < .01$ , \*\*\*  $p < .001$ .

**Figure 2**

*The Moderating Role of Friend Stability on the Effect of Victimization on Depressive Symptoms (Left) and Anxiety (Right)*

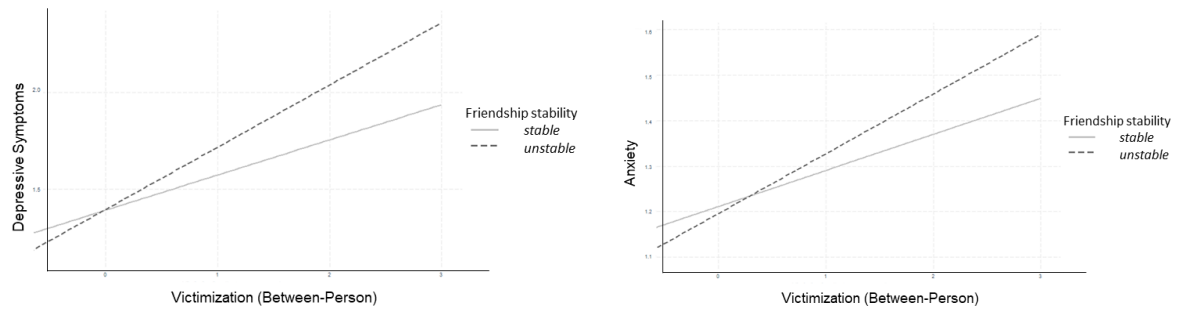

Supplement: MOESM1 [file 20355450]
